# Supplementary material for: Development of an eco-friendly approach based on dispersive liquid–liquid microextraction for the quantitative determination of quercetin inNasturtium officinale,Apium graveolens,Spinacia oleracea,Brassica oleracea var. sabellica, and food samples
Source: Royal Society of Chemistry journal article supplement (doi:10.1039/c8nj02485e), 2018-01-01
Supplement: c8nj02485e1.pdf [file c8nj02485e1.pdf]

## Supporting Information

---

### **Development of an eco-friendly approach based on dispersive liquid-liquid microextraction for the quantitative determination of quercetin in *Nasturtium officinale*, *Apium graveolens*, *Spinacia oleracea*, *Brassica oleracea var. sabellica*, and food samples**

Maryam Arabi,<sup>a</sup> Abbas Ostovan,<sup>a</sup> Arash Asfaram<sup>\*b</sup> and Mehrorang Ghaedi<sup>\*a</sup>

<sup>a</sup> Chemistry Department, Yasouj University, Yasouj 75914-35, Iran

<sup>b</sup> Medicinal Plants Research Center, Yasuj University of Medical Sciences, Yasuj, Iran

---

---

\* Corresponding authors: E-mail address:  
[arash.asfaram@yums.ac.ir](mailto:arash.asfaram@yums.ac.ir) (A. Asfaram),  
[m\\_ghaedi@mail.yu.ac.ir](mailto:m_ghaedi@mail.yu.ac.ir) (M. Ghaedi)

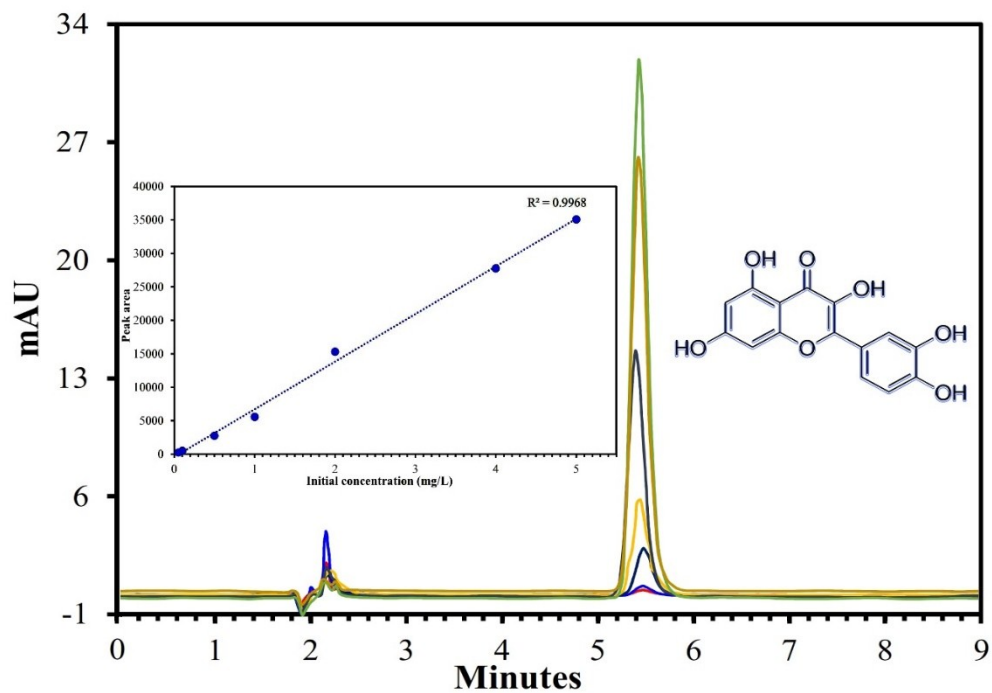

**Fig. S1.** Structure and calibration curve of quercetin before preconcentration. mobile phase: methanol: orthophosphoric acid 0.3% [70:30, v/v]; flow rate: 1.0 mL min<sup>-1</sup>; column: KNAUER Smart line HPLC system equipped with UV-VIS 2550 Detector, Zorbax SB-C<sub>18</sub> column (15 cm × 3.9 mm id, 5 μm particle size) under ambient temperature (25 °C); λ = 365 nm.

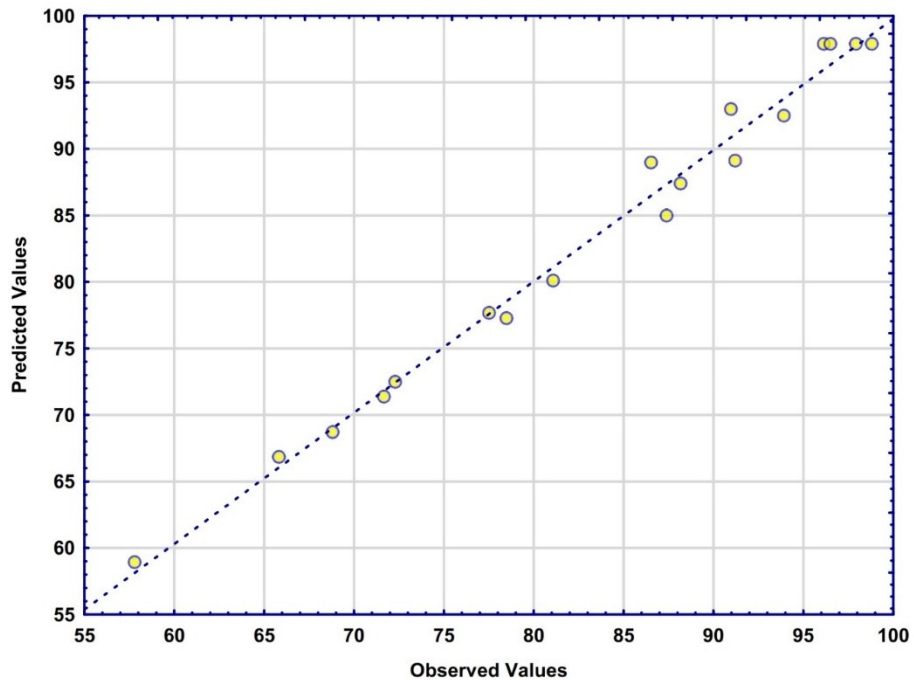

**Fig. S2.** Observed vs. predicted results for the extraction recovery of quercetin via CCD equation.

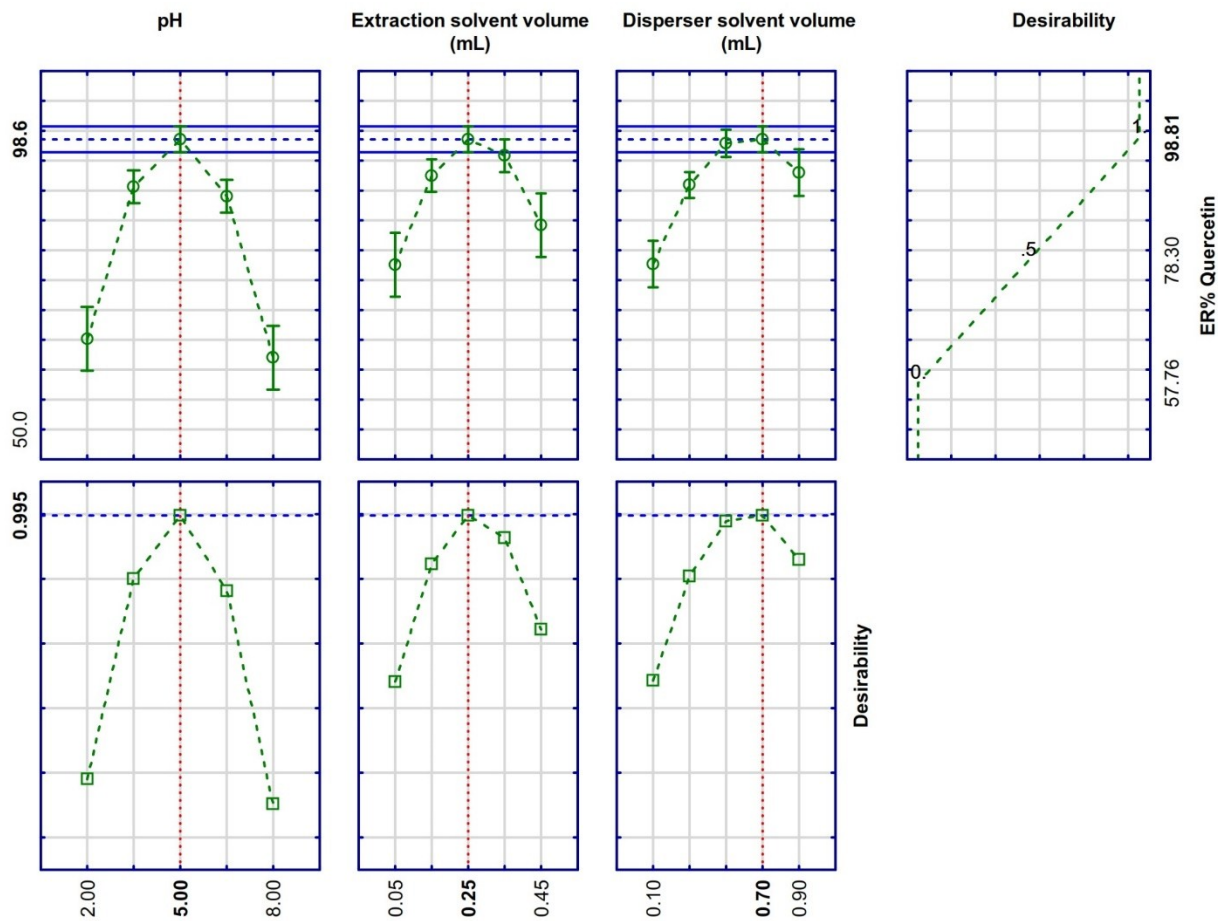

**Fig. S3.** Profiles for optimum conditions, predicted value, and desirability function for extraction recovery of quercetin. Vertical dashed lines indicate current values after optimization.

**Table S1.** Levels of variables and experimental design matrix for Plackett-Burman experiment with observed response for the significant variable determination.

| Independent variables                       |    |    |    | Unit | Levels   |               |           |
|---------------------------------------------|----|----|----|------|----------|---------------|-----------|
|                                             |    |    |    |      | Low (-1) | Center (0)    | High (+1) |
| (A) pH                                      |    |    |    | -    | 3.00     | 4.50          | 6.00      |
| (B) Ionic strength (NaCl)                   |    |    |    | %    | 0.00     | 5.00          | 10.0      |
| (C) Extraction solvent volume (Dodecanol)   |    |    |    | mL   | 0.10     | 0.25          | 0.40      |
| (D) Disperser solvent volume (acetonitrile) |    |    |    | mL   | 0.20     | 0.40          | 0.80      |
| (E) Extraction time                         |    |    |    | min  | 0.50     | 3.50          | 6.50      |
| Run                                         | A  | B  | C  | D    | E        | ER% quercetin |           |
| 1                                           | 1  | 1  | 1  | 1    | 1        | 67.86         |           |
| 2                                           | -1 | 1  | -1 | -1   | 1        | 25.65         |           |
| 3                                           | -1 | -1 | -1 | 1    | 1        | 40.76         |           |
| 4                                           | -1 | 1  | 1  | -1   | -1       | 45.98         |           |
| 5                                           | 0  | 0  | 0  | 0    | 0        | 74.40         |           |
| 6                                           | 1  | -1 | -1 | -1   | -1       | 48.98         |           |
| 7                                           | 0  | 0  | 0  | 0    | 0        | 75.65         |           |
| 8                                           | -1 | -1 | 1  | 1    | -1       | 53.87         |           |
| 9                                           | 1  | 1  | -1 | 1    | -1       | 60.87         |           |
| 10                                          | 1  | -1 | 1  | -1   | 1        | 54.40         |           |

**Table. S2.** Analytical characteristics of **DLLME-SFOD-HPLC-UV** for determination of quercetin.

| <b>Sample</b>                               | <b>Linear range (<math>\mu\text{g L}^{-1}</math>)</b> | <b>LOD (<math>\mu\text{g L}^{-1}</math>)</b> | <b>LOQ (<math>\mu\text{g L}^{-1}</math>)</b> | <b>R<sup>2</sup></b> | <b>EF</b> |
|---------------------------------------------|-------------------------------------------------------|----------------------------------------------|----------------------------------------------|----------------------|-----------|
| Red onion                                   | 0.80-3500                                             | 0.157                                        | 0.522                                        | 0.9976               | 102.30    |
| Double-distilled water                      | 0.80-3500                                             | 0.161                                        | 0.537                                        | 0.9978               | 99.43     |
| Spinach ( <i>Spinacia oleracea</i> )        | 0.80-3500                                             | 0.155                                        | 0.518                                        | 0.9969               | 103.05    |
| Celery ( <i>Apium graveolens</i> )          | 0.90-3500                                             | 0.162                                        | 0.541                                        | 0.9986               | 98.67     |
| Broccoli ( <i>Brassica oleracea</i> )       | 0.85-3500                                             | 0.150                                        | 0.501                                        | 0.9976               | 106.63    |
| White onion                                 | 0.80-3200                                             | 0.155                                        | 0.517                                        | 0.9930               | 103.23    |
| Watercress ( <i>Nasturtium officinale</i> ) | 1.00-3500                                             | 0.165                                        | 0.551                                        | 0.9960               | 96.90     |
| Apple juice                                 | 0.80-3500                                             | 0.149                                        | 0.495                                        | 0.9995               | 107.78    |
